# Supplementary material for: ScanIndel: a hybrid framework for indel detection via gapped alignment, split reads and de novo assembly
Source: PubMed Central journal article supplement (PMC4671222; doi:10.1186/s13073-015-0251-2), 2015-12-07

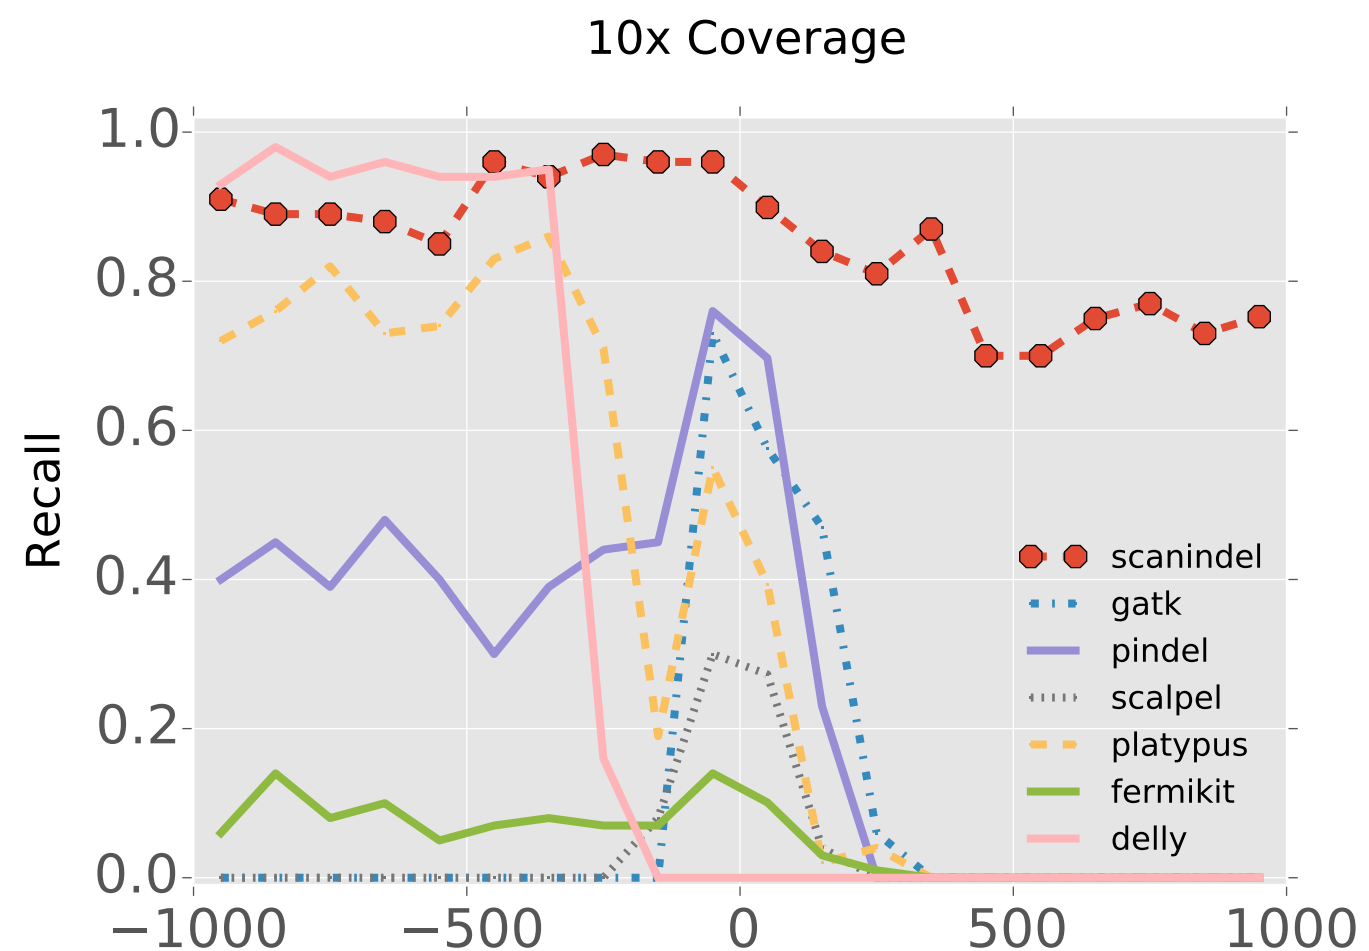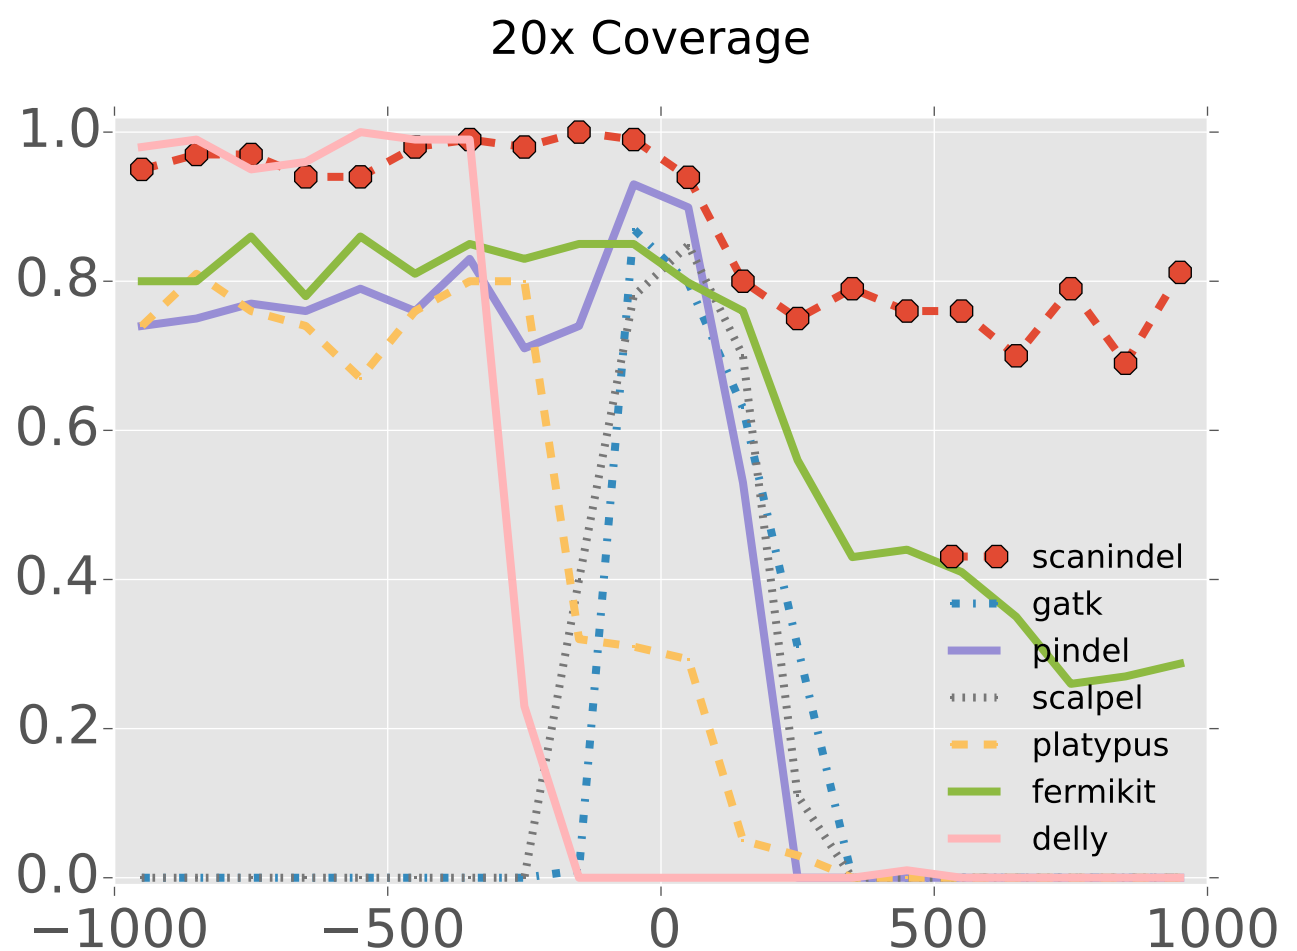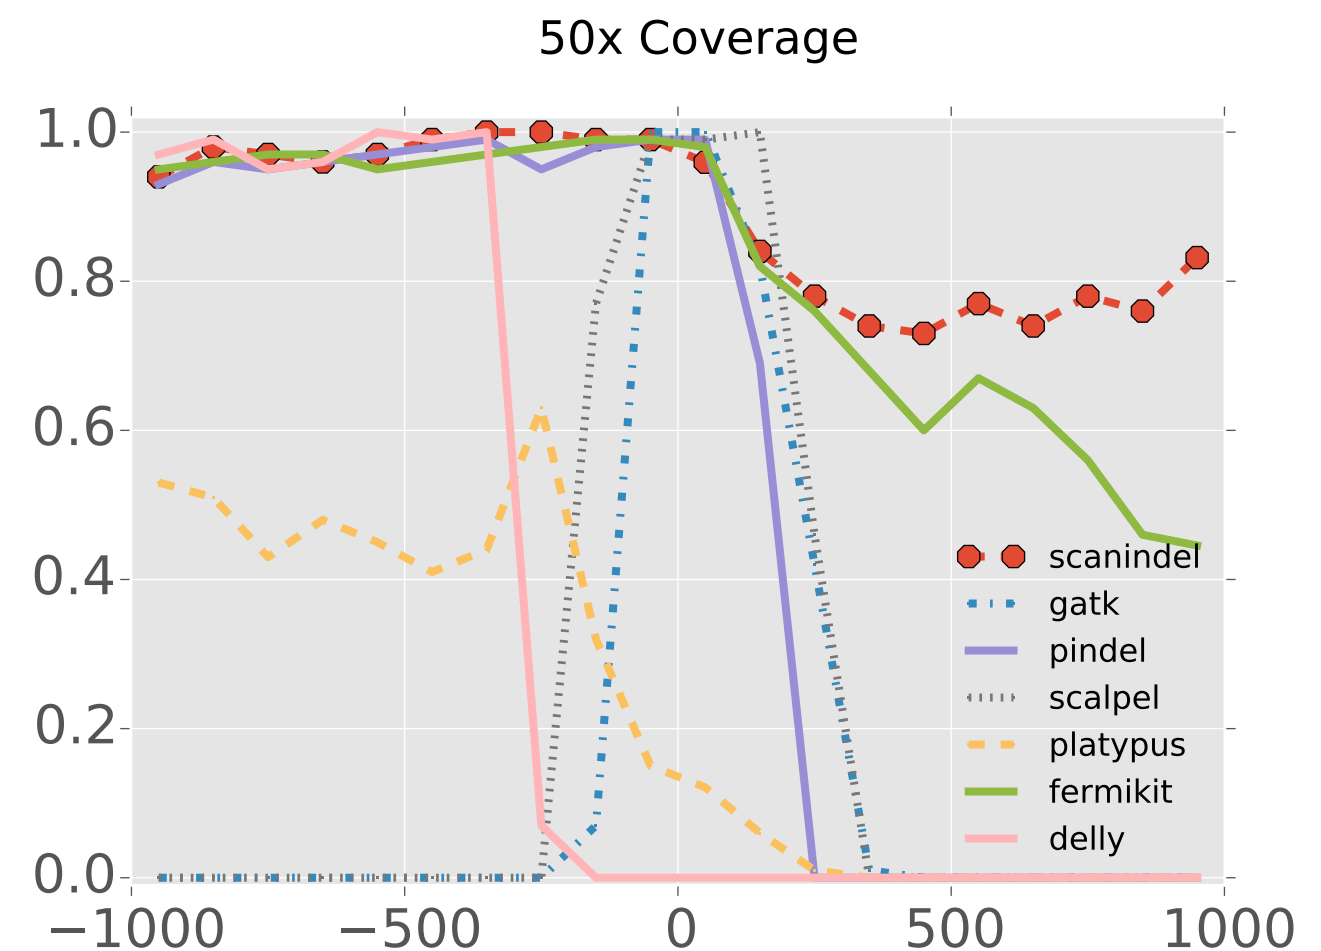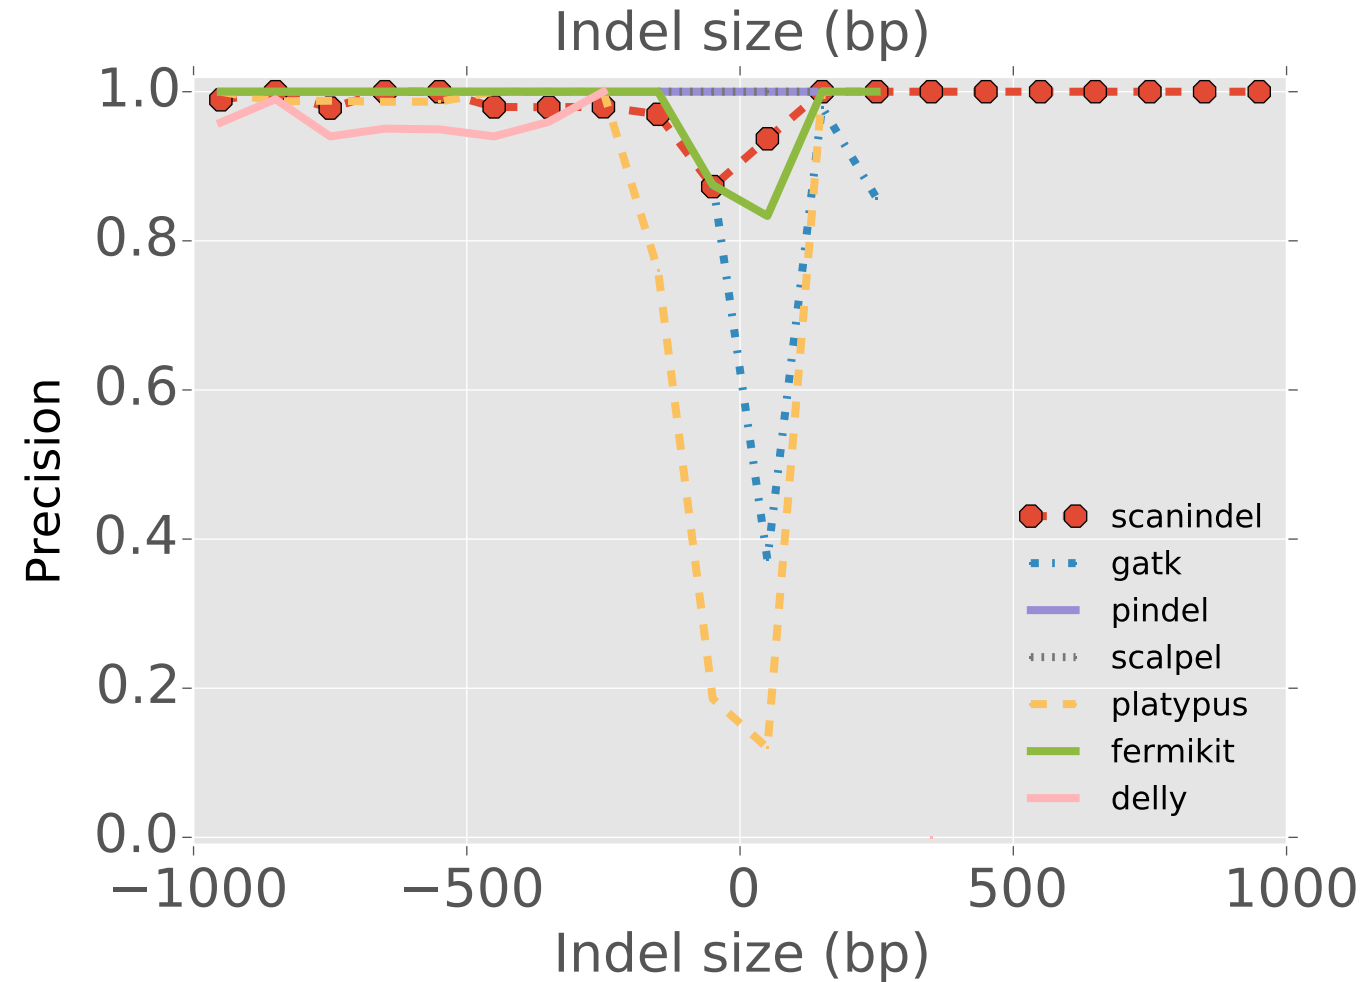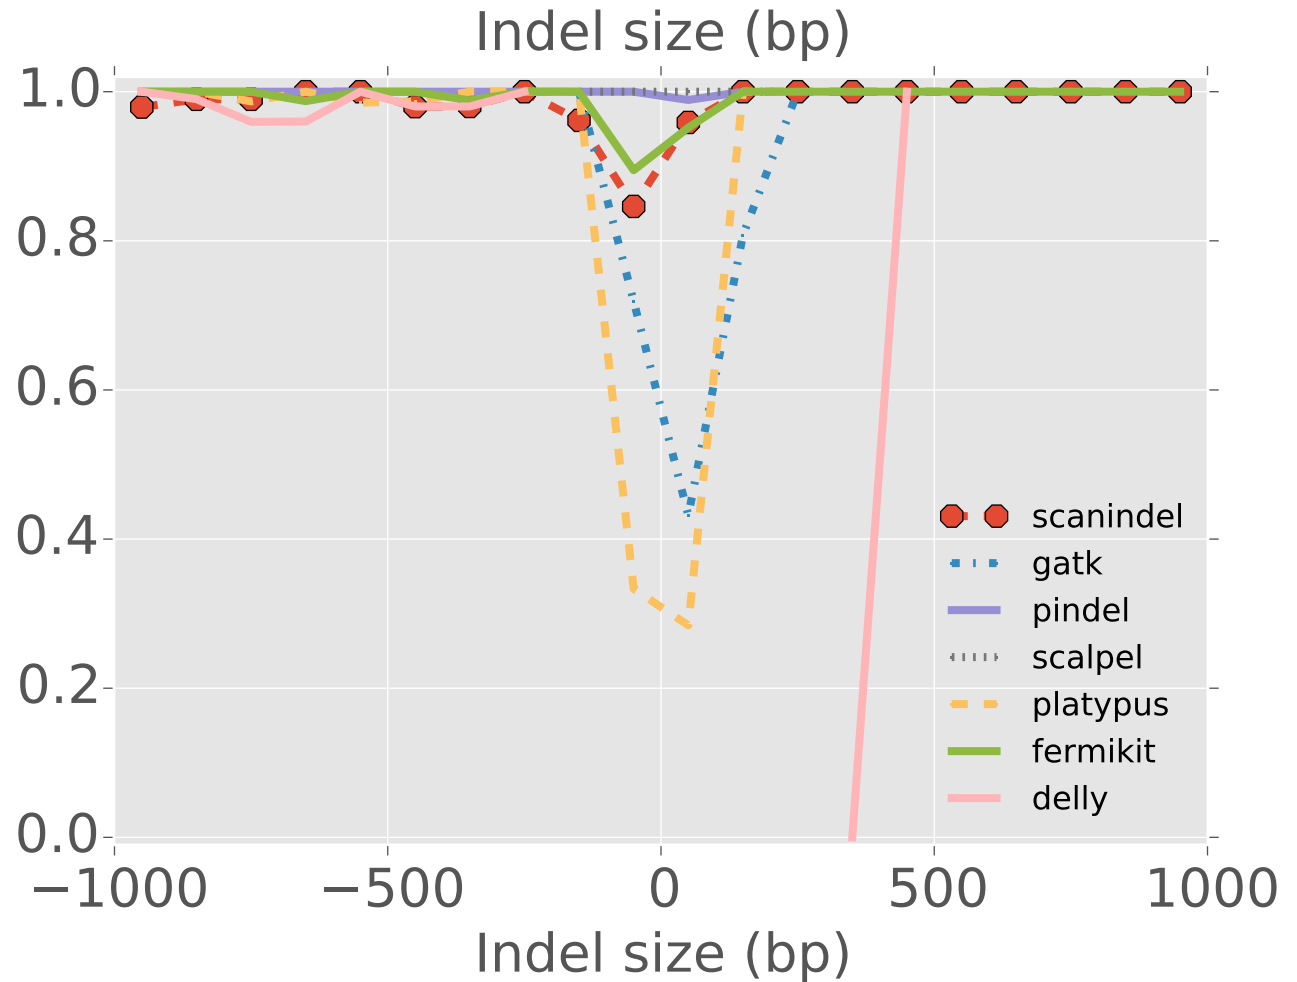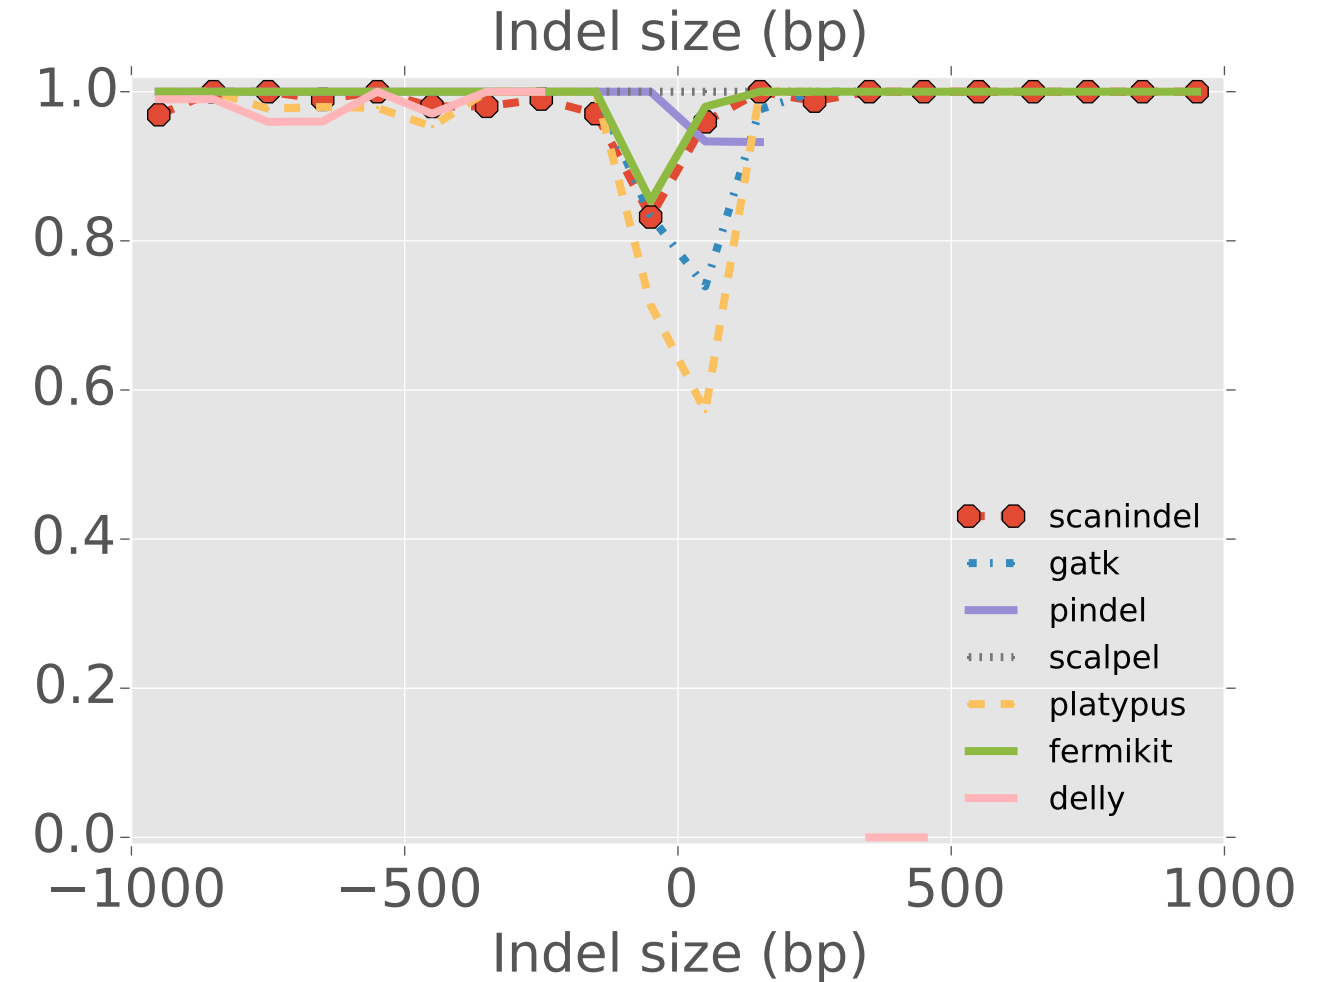

Supplement: 13073_2015_251_MOESM3_ESM.pdf [file 13073_2015_251_MOESM3_ESM.pdf]
